# Supplementary material
Source: PubMed Central journal article supplement (PMC9898094)
Supplement: NIHMS1840592-supplement-1.pdf [file NIHMS1840592-supplement-1.pdf]

**eTable 1 Comparison of the Analytic Sample and Missing Biomarker Sample**

|                      | Analytic Sample              | Missing              |
|----------------------|------------------------------|----------------------|
|                      | Mean or %                    | Mean or %            |
| Age                  |                              |                      |
| Mean Age             | 68.1 (SD=8.3) <sup>***</sup> | 69.2 (SD=10.3)       |
| %56-74 years         | 77.5%                        | 73.2% <sup>***</sup> |
| %75+ years           | 22.5%                        | 26.9% <sup>***</sup> |
| %Female              | 55.3%                        | 53.1% <sup>*</sup>   |
| Race/ethnicity       |                              |                      |
| %Non-Hispanic White  | 82.1%                        | 78.8% <sup>***</sup> |
| %Non-Hispanic Black  | 8.9%                         | 11.8% <sup>***</sup> |
| %Hispanic            | 9.1%                         | 9.5%                 |
| %Education           |                              |                      |
| <=11 years           | 12.4%                        | 16.6% <sup>***</sup> |
| 12 years             | 30.5%                        | 28.7% <sup>*</sup>   |
| 13-15 years          | 25.8%                        | 24.8%                |
| 16+ years            | 31.4%                        | 29.9%                |
| %No Health Insurance | 3.2%                         | 4.4%                 |

<sup>\*\*\*</sup>p<.001; <sup>\*\*</sup>p<.01; <sup>\*</sup>p<.05

**eTable 2 Mean of 22 individual biomarkers included in Expanded Biological Age for US-born Hispanics and Foreign-born Hispanics, HRS 2016**

|                                               | US-born Hispanic<br>(N=234) | Foreign-born Hispanic<br>(N=357) |
|-----------------------------------------------|-----------------------------|----------------------------------|
| <b>Cardiovascular</b>                         |                             |                                  |
| Systolic Blood Pressure (mmHg) <sup>1,2</sup> | 129.1                       | 129.4                            |
| NT-PROBNP (pg/mL) (logged)                    | 4.6                         | 4.4                              |
| <b>Metabolic</b>                              |                             |                                  |
| Total cholesterol (mg/dL) <sup>2</sup>        | 187.3                       | 193.1                            |
| HbA1c (%) <sup>1</sup>                        | 6.3                         | 6.3                              |
| IGF 1 (ng/mL) <sup>2</sup>                    | 82.8                        | 93.8***                          |
| <b>Kidney Functioning</b>                     |                             |                                  |
| Cystatin C (mg/L)                             | 1.2                         | 1.1**                            |
| BUN (mg/dL) <sup>2</sup>                      | 16.7                        | 15.9                             |
| <b>Infection and Inflammation</b>             |                             |                                  |
| CMV (COI) <sup>2</sup>                        | 429.1                       | 441.8                            |
| CRP (mg/L) (logged)                           | -1.4                        | -1.4                             |
| Albumin (g/dL)                                | 3.9                         | 4.0                              |
| IL6 (pg/mL) (logged)                          | 1.5                         | 1.3***                           |
| TNFR1 (pg/mL) <sup>2</sup>                    | 1770.5                      | 1597.7**                         |
| IL-10 (pg/mL) <sup>2</sup>                    | 3.8                         | 3.7                              |
| IL-1Ra (pg/mL) <sup>2</sup>                   | 535.4                       | 508.0                            |
| TGFB (pg/mL) <sup>2</sup>                     | 48448.8                     | 49865.5                          |
| White blood cell count <sup>2</sup>           | 6.7                         | 6.8                              |
| <b>Immune Functioning</b>                     |                             |                                  |
| Lymphocyte % <sup>2</sup>                     | 32.2                        | 32.2                             |
| CD4/CD8 count <sup>2</sup>                    | 3.5                         | 3.2                              |
| <b>Hematological</b>                          |                             |                                  |
| Mean Cell Volume <sup>2</sup>                 | 92.3                        | 92.8                             |
| Red cell distribution width                   | 14.0                        | 13.7**                           |
| <b>Organ Functioning</b>                      |                             |                                  |
| Alkaline phosphatase (U/L) <sup>2</sup>       | 91.9                        | 88.6                             |
| Peak Flow (L/min) <sup>2</sup>                | 340.1                       | 321.9                            |
| <b>Demographics</b>                           |                             |                                  |
| %Female                                       | 61.3%                       | 61.6%                            |
| Mean Age                                      | 67.7                        | 66.4*                            |
| <b>Expanded Biological Age</b>                | 69.4                        | 66.9**                           |

\*\*\*p<.001; \*\*p<.01; \*p<.05, indicates difference from US-Born Hispanic

Note: <sup>1</sup>2014 and 2016 combined.

<sup>2</sup> Due to small but significant effect of these markers on health outcomes in regression equations, we divide these markers by 100 to visualize the effects of these markers on health outcomes in later analyses.
